# Supplementary material for: A genome-wide association scan in admixed Latin Americans identifies loci influencing facial and scalp hair features
Source: Springer Nature journal article supplement (doi:10.1038/ncomms10815), 2016-03-01
Supplement: ncomms10815-s1.pdf [file ncomms10815-s1.pdf]

A genome-wide association scan in admixed Latin Americans identifies loci influencing facial and scalp hair features | Nature Communications


Skip to main content

Thank you for visiting nature.com. You are using a browser version with limited support for CSS. To obtain
the best experience, we recommend you use a more up to date browser (or turn off compatibility mode in
Internet Explorer). In the meantime, to ensure continued support, we are displaying the site without styles
and JavaScript.

Advertisement

- View all journals
- Search
- My Account

  Login

- Explore content
- About the journal
- Publish with us

- Sign up for alerts
- RSS feed


1. nature
2. nature communications
3. articles
4. article

A genome-wide association scan in admixed Latin Americans identifies loci influencing facial and scalp hair features

Download PDF

Download PDF

- Article
- Open access
- Published: 01 March 2016

# A genome-wide association scan in admixed Latin Americans identifies loci influencing facial and scalp hair features

- Kaustubh Adhikari1,
- Tania Fontanil2,
- Santiago Cal2,
- Javier Mendoza-Revilla1,3,
- Macarena Fuentes-Guajardo1,4,
- Juan-Camilo Chacón-Duque1,
- Farah Al-Saadi1,
- Jeanette A. Johansson 
  ORCID: orcid.org/0000-0002-2581-93685,
- Mirsha Quinto-Sanchez6,
- Victor Acuña-Alonzo1,7,
- Claudia Jaramillo8,
- William Arias8,
- Rodrigo Barquera Lozano7,9,
- Gastón Macín Pérez7,9,
- Jorge Gómez-Valdés10,
- Hugo Villamil-Ramírez9,
- Tábita Hunemeier11nAff15,
- Virginia Ramallo6,11,
- Caio C. Silva de Cerqueira6,11,
- Malena Hurtado3,
- Valeria Villegas3,
- Vanessa Granja3,
- Carla Gallo3,
- Giovanni Poletti3,
- Lavinia Schuler-Faccini11,
- Francisco M. Salzano11,
- Maria-Cátira Bortolini11,
- Samuel Canizales-Quinteros9,
- Francisco Rothhammer12,
- Gabriel Bedoya8,
- Rolando Gonzalez-José6,
- Denis Headon5,
- Carlos López-Otín2,
- Desmond J. Tobin13,
- David Balding 
  ORCID: orcid.org/0000-0002-1480-61151,14 &
- …
- Andrés Ruiz-Linares1

Show authors

*Nature Communications*
**volume 7**, Article number: 10815 (2016)
Cite this article

- 87k Accesses
- 110 Citations
- 1764 Altmetric
- Metrics details

### Subjects

- Genome-wide association studies
- Population genetics

## Abstract

We report a genome-wide association scan in over 6,000 Latin Americans for features of scalp hair (shape, colour, greying, balding) and facial hair (beard thickness, monobrow, eyebrow thickness). We found 18 signals of association reaching genome-wide significance (*P* values 5 × 10−8 to 3 × 10−119), including 10 novel associations. These include novel loci for scalp hair shape and balding, and the first reported loci for hair greying, monobrow, eyebrow and beard thickness. A newly identified locus influencing hair shape includes a Q30R substitution in the Protease Serine S1 family member 53 (*PRSS53*). We demonstrate that this enzyme is highly expressed in the hair follicle, especially the inner root sheath, and that the Q30R substitution affects enzyme processing and secretion. The genome regions associated with hair features are enriched for signals of selection, consistent with proposals regarding the evolution of human hair.


### Similar content being viewed by others

### Inferring gene regulatory networks from single-cell multiome data using atlas-scale external data

Article
Open access
12 April 2024

### Genome-wide association studies

Article
26 August 2021

### Tissue-specific enhancer–gene maps from multimodal single-cell data identify causal disease alleles

Article
09 April 2024

## Introduction

There is great diversity in primates with regard to hair appearance, including its distribution, shape and colour1. Hair plays a range of important functions, including thermal regulation, camouflage, sensory and social signalling, and the evolution of hair has been proposed to be influenced by both natural and sexual selection1. Humans differ from other primates in having lost most terminal body hair (via hair follicle miniaturization), possibly in connection to the adaptive development of more efficient sweating, linked to bipedalism2,3. However, considerable head hair has been retained in modern humans and its appearance shows extensive variation between individuals4,5,6. Head hair appearance is highly heritable7,8,9,10 and certain traits show high differentiation between continental native populations. For instance, variation in hair colour is essentially restricted to West Eurasia11, whereas straight hair is virtually absent from sub-Saharan Africa4. It has been proposed that variation in head hair appearance has been influenced by selection during the evolution of modern humans2,3,11. Although genetic association studies for human hair traits are few to date, loci influencing male pattern baldness, scalp hair colour and shape (curliness) have been identified in samples of European and East Asian ancestry6. Consistent with the key role of androgens in balding, the androgen receptor (*AR*) gene region has been highlighted as a major determinant among several loci associated with male-pattern baldness12. The genes associated with hair colour, involved in various aspects of melanocyte biology and melanin synthesis, also often impact on skin and eye pigmentation13. Interestingly, different genes have been associated with straight hair in Europeans and East Asians, suggesting that this trait evolved independently at least twice. The most robust associations for straight hair have implicated Trichohyalin (*TCHH*, a structural hair protein) in Europeans14,15, and *EDAR* (a cell signalling receptor) in East Asians16, illustrating the range of cellular mechanisms that can impact on hair shape.

To further our understanding of the genetic basis of variation in human hair, we performed a genome-wide association study (GWAS) in individuals of mixed European, Native American and African ancestry, who show high genetic diversity and extensive variation in head hair appearance. We report ten novel genetic associations, including the first reported loci for hair greying and for facial hair distribution/density. A newly identified locus influencing scalp hair shape encodes a serine protease (PRSS53) that we show is expressed in the hair follicle, with strongest association seen for a Q30R substitution that we show affects enzyme processing. Similar to what has been observed in the *EDAR* gene region, we find evidence of recent selection in East Asians at *PRSS53*.

## Results

### Study population and phenotypes

Our study sample consists of 6,630 volunteers from the CANDELA cohort recruited in five Latin American countries (Brazil, Colombia, Chile, México and Perú; Supplementary Table 1)17,18. In these individuals, we performed a categorical assessment (in men and women) of: scalp hair shape (curliness), colour, balding and greying as well as (in men) of beard thickness (that is, density), monobrow and eyebrow thickness (Fig. 1 and Supplementary Fig. 1). These individuals were genotyped on Illumina’s Omni Express BeadChip. After applying quality control filters, 669,462 single-nucleotide polymorphisms (SNPs) and 6,357 individuals were retained for further analyses (including 2,922 males). Average autosomal admixture proportions for this sample were estimated as: 48% European, 46% Native American and 6% African, but with substantial inter-individual variation (Supplementary Fig. 2). Several of the traits examined show low to moderate, but significant, correlations between them and with basic covariates (using a 10−3 Bonferroni-adjusted threshold; Supplementary Table 2). The highest significant trait correlations occur between: beard and eyebrow density and monobrow (*r*=0.14 to *r*=0.24); balding and beard density (*r*=0.15); hair greying and balding (*r*=0.13) and hair greying and beard density (*r*=0.13). The highest trait-covariate correlations detected were: age with hair greying (*r*=0.56), balding (*r*=0.15), beard density (*r*=0.28) and eyebrow thickness (*r*=−0.17); balding and hair colour with sex (*r*=−0.35 and *r*=−0.10); European ancestry correlates most strongly with hair colour (*r*=−0.32) and beard density (*r*=0.3). Based on a kinship matrix derived from the SNP data19, we estimated narrow-sense heritability using GCTA20. We found significant values for all the traits examined (Supplementary Table 3), with the highest heritability being estimated for hair colour (1) and the lowest for hair greying (0.27). These estimates of heritability are similar to other available estimates based on family data7,8,9,10.

**Figure 1: GWAS results overview.**

At the top are shown drawings illustrating the seven hair features examined in the CANDELA study sample. Thick lines connect these features with the candidate genes identified in regions with SNPs reaching genome-wide significant association (Table 1). At the bottom is shown a composite Manhattan plot displaying all significantly associated SNPs for the hair features examined. The rs number of the SNP with the smallest *P* value is shown at the top of each association peak (Table 1 index SNP). Composite panels in this and subsequent figures were made using Photoshop67.

Full size image

### GWAS for hair features

We performed genome-wide association tests on 9,143,600 chip genotyped and imputed SNP data using multivariate linear regression, as implemented in PLINK21, using an additive genetic model adjusting for: age, sex and the first five SNP principal components (Supplementary Fig. 3). All the traits scored showed genome-wide significant association (*P* values<5 × 10−8) with SNPs in at least one genomic region (Fig. 1 and Table 1). We re-examined the association signals for each index SNP in every country sample separately (by performing independent association tests) and combined results as a meta-analysis using METAL22. For each SNP, significant effects were in the same direction in all countries, the variability of effect size across countries reflecting sample size (Fig. 2, Supplementary Fig. 4 and Supplementary Table 4). To probe the extent of phenotypic variation captured by the genetic data, we constructed a phenotype prediction model combining the index SNPs (Table 1) and a BLUP (Best Linear Unbiased Predictor) random effects component calculated from the genome-wide kinship matrix19, in addition to covariates (Supplementary Table 5). The BLUP term is sensitive to the effect of SNPs associated below the threshold for genome-wide significance. The prediction accuracy of this model was broadly consistent with the heritability estimates (Supplementary Table 3). Highest prediction accuracy was observed for hair colour, with 41% of the total phenotypic variance for this trait being captured by the model, including 20% explained by the index SNPs and the BLUP component. The lowest prediction accuracy was seen for monobrow, for which 16.2% of the total phenotypic variance was captured by the model. The difference between the heritability estimates and the prediction accuracy partly reflects limitations of the model, including that the BLUP component is likely to capture imperfectly the polygenicity of the traits examined (Supplementary Fig. 5).

**Table 1 Features of index SNPs showing strongest genome-wide significant association (*P* value <5 × 10−8) to the scalp and facial hair features examined in the CANDELA sample.**

Full size table

**Figure 2: Effect sizes for the derived allele at index SNPs (Table 1) in ten genomic regions not previously associated with hair traits.**

(**a**) 10p14 hair shape, (**b**) 16p11 hair shape, (**c**) 2q12 beard thickness, (**d**) 4q12 bear thickness, (**e**) 6q12 beard thickness (**f**) 7q31 beard thickness (**g**) 3q22 eyebrow thickness, (**h**) 2q36 monobrow, (**i**) 6p25 hair greying, (**j**) 10q22 balding. Blue boxes represent regression coefficients (*x* axis) estimated in each country. Red boxes represent effect sizes estimated in the combined meta-analysis. Blue box sizes are proportional to sample size. Horizontal bars indicate a 95% confidence interval of width equal to 2 × standard errors. Meta-analysis *P* values are shown in Supplementary Table 4. Similar plots for regions previously associated with hair traits that were replicated here are shown in Supplementary Fig. 4.

Full size image

### Candidate genes in genome regions associated with hair traits

Several of the regions showing genome-wide significant association include strong candidate genes. Scalp hair shape and beard thickness are strongly associated with SNPs in 2q12 (Fig 3a,b) and two other traits (eyebrow thickness and monobrow) show genome-wide suggestive *P* values for SNPs in this same region (Supplementary Fig. 6). Associated SNPs overlap the *EDAR* (ectodysplasin A receptor) gene. EDAR acts as part of the EDA-EDAR-EDARADD signalling pathway23 during prenatal development to specify the location, size and shape of ectodermal appendages, such as hair follicles, teeth and glands23. Strongest association with hair shape was observed for SNP rs3827760 (Fig. 3a and Table 1), coding for a V370A substitution in EDAR. This variant has been robustly associated with hair shape in East Asians16,24,25. In a previous study of the CANDELA sample, which examined 30 ancestry informative markers, we found association between hair shape and a SNP in *EDAR* that is in strong linkage disequilibrium (LD) with rs3827760 in the 1000 genomes data17. The *EDAR* SNP showing strongest association with beard density is not the coding SNP rs3827760 associated with hair shape but rather rs365060 located ∼62 kb upstream of rs3827760 in the first intron of *EDAR* (Fig. 3b). Several SNPs in this intron have smaller association *P* values than rs3827760 and analyses conditioning on rs3827760 suggest that the association signal of SNPs in this intron is independent from that observed at rs3827760 (Supplementary Fig. 7). These intronic SNPs are located in a different LD block and there is a recombination hotspot between them and rs3827760 (Fig 3a,b and Supplementary Fig. 7A). Interestingly, the first intron of *EDAR* is rich in regulatory elements and SNPs in this intron show evidence of recent selection in Europeans (discussed further below). Hypohidrotic ectodermal dysplasia is a Mendelian disorder caused by mutations in the EDA-EDAR-EDARADD pathway and is characterized by sparse scalp hair, eyebrows and eye lashes23. Transgenic mice with increased *Edar* function have been shown to have thickened and straightened hair fibres26,27. We therefore examined chin hair follicle density in wild-type mice and in an *Edar* gain-of-function transgenic strain (*Edar**Tg951/Tg951*)26. Consistent with the effect of *EDAR* on beard thickness, we found that the *Edar**Tg951/Tg951* strain has significantly lower chin hair follicle density compared with wild-type mice (Fig. 4a,b).

**Figure 3: Association plots for six regions with SNPs showing genome-wide significant association to hair traits.**

(**a**) 2q12 hair shape, (**b**) 2q12 beard thickness, (**c**) 16p11 hair shape, (**d**) 3q22 eyebrow thickness, (**e**) 2q36 monobrow, (**f**) 6q25 hair greying. The index SNP in each region (Table 1) is shown as a purple diamond. At the top of the figure are shown the association results (on a -log10 *P* scale; left *y* axis) for all genotyped and imputed SNPs. The dot colour indicates the strength of LD (*r*2) between the index SNP and each SNP (based on the 1000genomes AMR data set). Recombination rate across the region, in the AMR data, is shown as a continuous blue line (scale on the right *y* axis). Genes in the region are shown in the middle. These plots were produced using LocusZoom68. Below each LocusZoom plot we show an LD heatmap (using *r*2, red indicating *r*2=1 and white indicating *r*2=0) produced using Haploview69. Coordinates used are from human genome sequence build 37. Plots for regions not shown here are presented in Supplementary Fig. 8.

Full size image

**Figure 4: *EDAR* effects on mouse facial hair follicle density and expression of PRSS53 in anagen (growing) human hair follicles.**

(**a**) Frontal photographs showing part of the lower facial region from 14.5-day-old mouse embryos stained by *in-situ* hybridization for detecting *Sostdc1* to reveal hair placodes (primordia of hair follicles) as blue foci. We compared placode density in the lower jaw of wild-type (+/+) mice with an *Edar* transgenic having a high copy number of *Edar (Edar**Tg951/Tg951*)26. The black scale bar equals 0.5 mm. (**b**) Bar plot comparing placode density in mice with different *Edar* genotypes (*n*=4). Mean density in *Edar*+/+ mice was 53 placodes per mm2 (standard deviation=1.3) and 35 placodes per mm2 (standard deviation=1.5) in *Edar**Tg951/Tg951* mice, the difference between means being significant (exact *P* value of 0.028). Error bars represent ±3 standard deviations. (**c**–**f**) Anagen human hair follicle stained with anti-PRSS53 antibody (green) and with anti-melanocyte antibody (red), and counterstained with 4,6-diamidino-2-phenylindole (DAPI; blue, nuclei). (**c**) Hair follicle bulb showing PRSS53 expression in the developing IRS, pre-cortex and in some melanocytes (arrow and inset) as indicated by the yellow–orange staining. (**d**) Mid hair follicle showing expression of PRSS53 in maturing IRS keratinocytes (arrows). (**e**) Distal hair follicle showing high expression of PRSS53 in IRS cells around the level of DNA degradation in hair fibre (HF) keratinocytes (as indicated by a reduction in DAPI staining in this region HF). PRSS53 is also expressed in the IRS companion layer (CL; \*). (**f**) Upper distal hair follicle at sebaceous gland level (Sg) showing PRSS53 expression in scattered peri-follicular cells just below the Sg and in the IRS at the point of its dissolution (arrows). (**g**–**j**) Anagen human hair follicle stained with anti-PRSS53 antibody (green) and with anti-TCHH antibody (red), and counter-stained with DAPI (blue, nuclei). (**g**) Hair follicle bulb showing co-localization (orange/yellow) of PRSS53 and TCHH in the developing IRS, especially in the most external IRS layer. (**h**) Supra-bulbar region of the hair follicle showing expression of PRSS53 in the developing companion layer (\*) of the IRS (green) and some co-localization with TCHH in the inner IRS. (**i**) Mid hair follicle showing expression of PRSS53 in the IRS companion layer (\*) and the central medulla (Md) of the developing HF. (**j**) Upper hair follicle showing PRSS53 expression in the companion layer of the IRS (\*) and in the TCHH-positive IRS. Co, hair fibre cortex; FP, follicular papilla; IRS, inner root sheath; Md, medulla; pCo, pre-cortex; ORS, outer root sheath; Sg, sebaceous gland. Grey scale bars correspond to 40 μm in each figure.

Full size image

Apart from 2q12, scalp hair shape is associated with SNPs in three other genomic regions (in 1q21, 10p14 and 16p11). Genome-wide significant association in the 16p11 region was strongest for rs11150606, the derived allele of which codes for a Q30R substitution in the Protease Serine S1 family member 53 (PRSS53; Fig. 3c and Table 1). Proteases and protease inhibitors are known to be important for epidermal keratinization and regulate hair growth and cycling28. A spontaneous mouse mutant (frizzy, *fr*), characterized by curly whiskers, carries an amino-acid substitution in another serine protease (Prss8)29 and a conditional knock-out with no expression of *Prss8* in the epidermis shows hair abnormalities in newborns and defects in corneocyte morphogenesis, epidermal lipid composition, profilaggrin processing and tight junction assembly30. The 1q21.3 region overlaps the trichohyalin gene (*TCHH*), which has been previously associated with scalp hair curliness in Europeans14,15. Strongest association was seen for SNP rs11803731, encoding a M790L substitution in TCHH (Supplementary Fig. 8), consistent with previous GWASs14,15. *TCHH* is expressed in cornifying keratinocytes of epithelia, particularly in the inner root sheath (IRS) and the hair fibre medulla of hair follicles where it is involved in the cross-linking of the cornified envelope with cellular keratin filaments31. SNPs in 10p14 overlap LINC00708, ∼150 kb downstream of the GATA-binding protein 3 gene (*GATA3*), an interesting candidate in this region (Supplementary Fig. 8). *Gata3* is expressed in the hair follicle IRS of mice and a *Gata3* null mutant shows abnormal hair growth and shape32. Interestingly, *Gata3* mutant hair follicles have greatly reduced expression of trichohyalin33.

Eyebrow thickness shows genome-wide significant association to SNPs on 3q23 overlapping the forkhead box L2 (*FOXL2*) gene (Fig. 3d). Rare mutations in the *FOXL2* gene region (including coding variants as well as upstream and downstream intergenic rearrangements) cause blepharophimosis syndrome (BPES)34, an autosomal dominant eyelid malformation often accompanied by thick eyebrows. Mouse experiments have shown that *Foxl2* is expressed around the eyes up to the time that hair is formed (E13.5)35 and a mutant with altered *Foxl2* expression (and BPES features) typically shows hair loss around the eyes36.

Monobrow shows genome-wide significant association with SNPs in 2q36 with strongest association being observed for marker rs2395845 located ∼70 kb downstream of the paired box gene 3 (*PAX3*) gene, an interesting candidate in the region (Fig. 3e). Rare mutations of *PAX3* have been shown to cause Waardenburg syndrome type 1 (WS1). WS is a clinically and genetically heterogeneous Mendelian disorder of neural crest derivatives whose manifestations include deafness, a range of pigmentation abnormalities, broad nasal bridge and monobrow (seen in ∼85% of WS1 patients37). Intronic SNPs within *PAX3* have been implicated in recent GWASs of facial morphology, particularly in relation with nasion position (the point just above the nasal bridge)38,39. PAX3 is a key transcription factor during embryogenesis and analysis of mouse mutants have confirmed that it is essential to guide normal development of neural crest derivatives40.

Hair greying shows genome-wide significant association to SNP rs12203592 in intron 4 of the interferon regulatory factor 4 gene (*IRF4*; Fig. 3f). This SNP also shows association with hair colour in our sample (Table 1) and in previous studies this SNP has been associated with skin, hair and eye pigmentation13. Recent *in-vitro* studies have shown that rs12203592 impacts on the function of an enhancer element regulating *IRF4* expression and the induction of tyrosinase (TYR), a key enzyme in melanin synthesis41. In addition to *IRF4*, hair colour (but not hair greying) shows genome-wide significant association to four other well-established pigmentation gene regions (*SLC45A2*, *TYR*, *OCA2*/*HERC2* and *SLC24A5*; Table 1 and Supplementary Fig. 8)13. Finally, for balding, we replicate association to the well-established Androgen Receptor/Ectodysplasin A2 Receptor (*AR/EDA2R*) locus on Xq12 (ref. 12; Supplementary Fig. 8).

The other four genomic regions showing genome-wide association include no strong candidate genes with established roles in hair biology (Table 1 and Supplementary Fig. 8). Beard thickness is associated with SNPs in 7q31, 4q12 and 6q21 where the nearest genes are, respectively: forkhead box P2 (*FOXP2*), ligand of numb-protein X 1 (*LNX1*) and prolyl endopeptidase (*PREP*; Supplementary Fig. 8). None of these genes have known functions specifically related to hair. Similarly, balding is associated with SNPs in the second intron of the Glutamate receptor delta-1 subunit gene (*GRID1*) on 10q22 but this gene has no documented role in hair biology.

### PRSS53 and hair shape

Among the SNPs in regions showing genome-wide significant association, a functional role potentially underlying the observed association is most suggestive for rs11150606 encoding the R30Q substitution in PRSS53, associated with scalp hair shape. Bioinformatic analysis indicates that this amino-acid change could introduce a subtilisin/kexin-like proprotein convertase site in PRSS53 (Supplementary Fig. 9), and thus could have the potential of affecting processing of the enzyme. To probe into the role of PRSS53 in hair development, we performed immunohistochemistry of human scalp hair follicles during active hair growth (anagen phase; Fig. 4c–j). Expression of PRSS53 was mainly detected in the developing IRS and pre-cortex of the hair fibre and in some bulbar melanocytes (Fig. 4c). PRSS53 expression was increased in subpopulations of IRS keratinocytes corresponding to early and late stages of hair fibre keratinization and IRS cornification (Fig. 4d,e). This pattern of expression is consistent with the hair-shape association we observe, as the cornifying IRS is thought to impart significant hair-shaping influence on the hair fibre42. Expression of PRSS53 appears to be modulated as a function of hair fibre differentiation, as evidenced by high PRSS53 expression at the level of the hair follicle where the hair fibre undergoes dissolution of nuclear DNA (Fig. 4e)43. Double immunofluorescence for PRSS53 and TCHH revealed co-expression of these proteins in specific elements of the IRS (Fig. 4g–j), suggesting that PRSS53 may also be associated with the maturation of this hair follicle sheath. The only other component of the hair follicle that expresses TCHH is the medulla of the hair fibre and this was also found to express PRSS53 (Fig. 4i). The medulla is a non-obligate component of the hair fibre, but when present it impacts on the mechanical properties of hair44. It is interesting that PRSS53 is expressed in the companion layer of the IRS (Fig. 4e,h–j), directly opposing the non-keratinizing, non-upwardly moving outer root sheath. It is not yet known how the ‘slippage’ of the inner versus outer hair follicle components occurs during outward hair fibre growth, but it is likely that protease activity is involved. Expression of PRSS53 changes in the upper IRS (Fig. 4f), at the level of the sebaceous gland, where the IRS undergoes a controlled dissolution, required for exiting of the hair fibre to the skin surface.

To evaluate the cellular impact of the Q30R substitution in PRSS53, we expressed both forms of the enzyme in 293-EBNA cells, a human cell line showing pro-protein convertase activity45. Western blot analysis of transfected cell extracts revealed a different signal peptide processing in the two forms of the enzyme and that PRSS53 Q30R has a slightly faster electrophoretic mobility, consistent with an extra proteolytic cleavage (Fig. 5a and Supplementary Fig. 9). These differences were not detected when the cell cultures were incubated with an inhibitor of pro-protein convertases (decanoyl-RVKR-CMK, DECA). Consistent with an altered processing of the enzyme affecting its secretion, the PRSS53 Q30R variant was less abundant in the cell culture media, except when cells were incubated in the presence of DECA (Fig. 5b). In agreement with the reduced secretion of PRSS53 Q30R seen in the western blot analyses, immunocytochemistry indicates a greater accumulation of this variant in the ER-transGolgi network (Fig. 5c). Altogether, these *in-vitro* analyses confirm that the Q30R substitution in PRSS53 can affect processing and secretion of the enzyme.

**Figure 5: Processing of PRSS53 and signals of selection in the PRSS53 gene region.**

Comparison of PRSS53 and PRSS53 (Q30R) from cell extracts (**a**) and media (**b**), after expression in 293-EBNA cells cultured in the absence (−) or presence (+) of DECA (decanoyl-RVKR-CMK, a pro-protein convertase inhibitor). (**a**) The top two bands seen in lanes loaded with PRSS53 cell extracts, result from partial processing of the signal peptide. In the absence of DECA, there appears to be an accumulation of PRSS53 (Q30R) without signal peptide. PRSS53 (Q30R) also has a slightly faster mobility compared with PRSS53 (a difference of eight amino acids based on the location of the pro-protein convertase site Supplementary Fig. 9). In the presence of DECA, both forms of the enzyme appear identically processed and there is no difference in mobility of the proteins. (**b**) The medium from cell cultures grown in the absence of DECA shows a reduced amount of PRSS53 (Q30R), compared with PRSS53. In the presence of DECA, the amount of protein in the media is similar for the two forms of the enzyme. Recombinant proteins were detected using an anti-FLAG antibody after migration on 13% SDS–polyacrylamide gel electrophoresis gels. Molecular weight markers (kDa) are indicated on the left. Beta-actin was used as a loading control (C=cells transfected with an empty vector). Full immunoblots for **a** and **b** are shown in Supplementary Fig. 11. (**c**) Immunostaining of 293-EBNA cells expressing PRSS53 and PRSS53 (Q30R). The enzyme was detected using an anti-FLAG antibody and the endoplasmic reticulum (ER) stained with an anti-calreticulin antibody. There is more abundant co-localization of the enzyme with the ER (white arrows) for PRSS53 (Q30R) compared with PRSS53, consistent with the intracellular accumulation of PRSS53 (Q30R). Negative controls, lacking primary antibodies for FLAG and calreticulin, are also shown. The scale bar indicates 10 μm. Magnification was the same for all photographs. (**d**) The top panel shows CMS scores (red dots) in the 1000 genomes ASN (JPT+CHB) data for SNPs in the 16p11 region associated with hair shape. The dotted line indicates the empirical significance threshold (1%). The SNP with the highest CMS score is rs11150606, coding for the Q30R substitution in PRSS53 (highlighted in purple) associated with hair curliness (Table 1 and Fig. 3c). Genes in the region are shown in the panel below (introns in magenta, exons in green). Coordinates are from human genome sequence Build 37.

Full size image

### Signatures of selection at associated gene regions

Some of the strongest signals of selection in the human genome detected in recent genome-wide searches involve pigmentation genes in Europeans and *EDAR* in East Asians27,46. To assess whether selection could have contributed broadly to shape variation at gene regions impacting on human hair features, we examined whether there is enrichment for signatures of selection at the regions showing evidence of association with hair traits in the CANDELA sample. For this purpose, we used the Composite of Multiple Signals (CMS) statistic calculated in the three main reference East Asian, European and African populations from the 1000 Genomes Project data47 (ASN, CEU and YRI, respectively). We contrasted the distribution of CMS scores at gene regions showing at least suggestive association to hair features (that is, regions marked by SNPs with association *P* values<10−5; Supplementary Table 6) with the distribution of CMS scores across the genome. We found significantly higher CMS scores in the hair-associated gene regions compared with the genome-wide distribution (one-sided Mann–Whitney *U*-test *P* value=2 × 10−8, *P*=2 × 10−5 and *P*=2 × 10−5 in ASN, CEU and YRI, respectively) and a significantly higher proportion of SNPs with empirically significant CMS scores (that is, SNPs in the top 1% of the distribution; one-sided Mann–Whitney *U*-test *P* values of 5 × 10−7, 1 × 10−4 and 4 × 10−4, in ASN, CEU and YRI, respectively). Noticeably, significant CMS scores were observed in ASN for SNPs in the *PRSS53* region associated with hair shape, the highest CMS score (12.96, empirical *P* value 3 × 10−4) being observed for SNP rs11150606, encoding the Q30R substitution in PRSS53 (Fig. 5d). In the *EDAR* region, we observe the previously documented strong signal of selection in ASN for variants around SNP rs3827760 (refs 27, 46, associated with hair shape (Table 1). We also observe a significant signal of selection in CEU for the intronic *EDAR* variants associated here with beard thickness, independently of rs3827760, discussed above (Fig. 3b and Supplementary Fig. 7b).

## Discussion

The analyses presented here have enabled us to expand substantially the set of gene regions known to impact on variation in human head hair appearance. This task has been facilitated by the extensive phenotypic and genetic diversity of the CANDELA sample, a result of Latin American history involving admixture between Africans, Europeans and Native Americans17. The predominant European and Native American ancestry of the CANDELA sample is expected to provide especially high power for the detection of genetic effects at loci with differentiated allele frequencies between those two continental populations. Consistently, allele frequencies at most index SNPs identified here show large differences between Europeans and East Asians/Native Americans (Supplementary Table 7). This strong differentiation in allele frequencies could relate partly to selection acting on the associated gene regions, as proposed for the evolution of human hair appearance2,3,11. The enrichment we observe for significant CMS scores at gene regions associated with hair features is consistent with this scenario. Interestingly, the pattern of variation at *PRSS53* is similar to that seen for *EDAR*, with significant CMS scores in East Asians and a functional amino acid changing variant reaching high frequency only in East Asia (Supplementary Table 7). These observations, and the fact that other genes are associated with straight hair in Europeans, are in line with the proposal that scalp hair shape has been the subject of recent selection in humans2,3.

There is increasing interest in elucidating the mechanisms influencing the shape of the growing hair fibre. Based on mouse studies it has been proposed that EDAR signalling is involved in determining hair shape through regulating expression of the key hair growth signal Shh (Sonic hedgehog)26. Higher Edar function increases *Shh* expression and causes it to become symmetrically expressed in the hair bulb, leading to straight hair growth presumably through promotion of symmetric cell proliferation26. Structurally, a key player in shaping hair is TCHH, involved in crosslinking the cornified envelope and keratins of IRS cells31. TCHH is one of the earliest differentiation proteins of the growing (anagen) hair follicle bulb, and is enriched in the IRS (representing ∼30% of its protein content). TCHH confers significant mechanical strength to the IRS via its enrichment in arginines and glutamines, which represent over 40% of TCHH amino acids. Many of the arginine residues undergo citrullination/deimination, whereas the glutamines are involved in intra- and interprotein chain crosslinks during the cornification/hardening of the IRS31. The progressive hardening of the IRS is thus thought to contribute to the moulding of the still-pliable hair fibre during hair growth. It is interesting to note that the TCHH SNP with smallest *P* value observed here (rs11803731) has also been strongly implicated by previous analyses in Europeans15,48, suggesting that this variant might be directly affecting hair shape. The M790L substitution in TCHH encoded by rs11803731 is not predicted to result in major structural alterations of TCHH, but it has been proposed that it could affect the post-translational processing of TCHH, with regulatory implications48. It will be important to assess whether TCHH is a substrate for PRSS53, given our observation that this enzyme is enriched in all layers of the IRS during the cornification/hardening stages of the hair fibre, as well as in the medulla (a component influencing the physico-mechanical characteristics of the hair fibre6). Proteases and protease inhibitors are important for epidermal keratinization and can regulate hair growth and cycling28. For example, optimal desquamation of the IRS (and overall hair growth cycling) is perturbed in lysosomal cysteine protease cathepsin L knock-out mice49. Moreover, given the similarity of PRSS53 with the kallikreins (the largest family of secreted serine protease endopeptidases) it is possible that PRSS53 lyses substrates in cornified tissues that ultimately desquamate50. Interestingly, it has been suggested that GATA3 (in the 10p14 region associated with hair shape) inhibits the expression of serine protease inhibitor Kazal type-5 (SPINK5), mutations of which cause Netherton syndrome, an autosomal recessive congenital ichthyosis characterized by so-called Bamboo hair, epidermal hyperplasia and an impaired epidermal barrier function51.

The colour of hair results from melanin pigments transferred to hair fibre keratinocytes from hair follicle melanocytes. These melanocytes differentiate from melanoblasts that migrate from the neural crest into hair follicles early in development6. Some hair follicle melanoblasts remain undifferentiated and serve as stem cells for the periodic replenishment of mature melanocytes, melanogenesis occurring only in the anagen phase of the hair growth cycle. Among the several hundred gene products known to participate in melanogenesis, recent association studies have identified a handful that influence hair colour variation in Europeans13. Most of these associations have been replicated here (Table 1), including that of the derived T allele at SNP rs12203592 in *IRF4* with lighter hair colour. It has been shown experimentally that IRF4 interacts with the microphthalmia-associated transcription factor (MITF, a key regulator of the expression of many pigment enzymes and differentiation factors), to activate the expression of TYR (a rate-limiting essential enzyme in melanin synthesis). The derived T allele at rs12203592 leads to reduced TYR expression and melanin synthesis, consistent with the association of this allele with lighter hair colour41. In line with the geographic distribution of light hair colour, the T allele at rs12203592 is essentially absent outside Europe (Supplementary Table 7). Interestingly, we find that the T allele at SNP rs12203592 is also associated with increased hair greying. Experimental evidence suggests that the mechanism of hair greying involves incomplete maintenance of melanocyte stem cells in the hair follicle6. Importantly, MITF is known to affect melanocyte survival via its regulation of anti-apoptotic Bcl2 expression, a key factor in protection of the hair follicle against oxidative stress6. To probe the mechanism by which IRF4 might impact on hair greying, it will therefore be important to evaluate whether the T allele at rs12203592 influences MITF in terms of melanoblast stem cell maintenance and survival or via melanocyte loss post differentiation.

The skin on different parts of the body has different hair characteristics, with the final hair distribution dependent upon the spacing pattern laid down during development, the extent of skin growth that occurs subsequent to pattern establishment, and to hormonal and ageing effects. The development of skin at different body sites is known to be controlled by an underlying transcription factor code52 to which FOXL2, FOXP2 and PAX3 may contribute in defining hair distribution on specific areas of the face. As hair of the beard is produced through a two-stage process of embryonic hair follicle patterning followed by a post-pubertal androgen-driven transformation into terminal hair, beard thickness could be modulated by genes acting either prenatally or at puberty. Our finding of reduced hair placode density in embryonic mice with increased *Edar* expression suggests that the basis for this variation lies in the recognized role of EDAR in developmental hair patterning53. It is likely that EDAR function affects hair follicle density on most or all of the human body, as described in the mouse26, but that on the head this effect is most readily apparent as variation in beard thickness. Analyses focusing on the mechanism by which associated genetic variants affect regional facial hair density should provide insights into developmental patterning in humans, and perhaps yield clues into the genetic basis for the striking modification of hair distribution that has occurred in human evolution54.

Elucidating the genetic architecture of normal variation in hair traits has implications outside basic bioscience. Among human visible phenotypes hair appearance is perhaps the mostly easily modified, a feature prominently exploited by the cosmetics industry. This industry has traditionally focused on the development of products altering the appearance of keratinous hair fibres after their exit from the skin surface. However, there is currently great interest in exploring whether hair appearance can be modified as it is formed in the hair follicle55. This includes evaluating whether hair greying could be slowed or blocked, and elucidating the mechanism by which IRF4 influences hair greying could provide targets of intervention for this purpose. Similarly, modulating the activity of PRSS53 in the IRS and medulla is a candidate pathway with a view to purposefully altering hair shape. The genetics of hair appearance is also of interest in anthropology and forensics, particularly for the prediction of hair features based on genetic information. The implementation of this so-called ‘forensic DNA phenotyping’ promises to contribute an investigative tool in cases where a biological sample is available but there is lack of other information regarding the identity of its contributor. The development of this approach in Europeans is fairly advanced for hair colour, and is beginning to be explored for balding and hair shape56. Considering the high genetic and phenotypic diversity of Latin American populations, appropriate tools will need to be in place for reliable phenotypic prediction in that context and the results presented here represent a step in that direction.

## Methods

### Study subjects

A total of 6,630 volunteers from five Latin American countries (Brazil, Chile, Colombia, Mexico and Peru), part of the CANDELA consortium sample (http://www.ucl.ac.uk/silva/candela)17,18, were included in this study (Supplementary Table 1). Ethics approval was obtained from: the Universidad Nacional Autónoma de México (México), the Universidad de Antioquia (Colombia), the Universidad Peruana Cayetano Heredia (Perú), the Universidad de Tarapacá (Chile), the Universidade Federal do Rio Grande do Sul (Brazil) and the University College London (UK). All participants provided written informed consent. Blood samples were collected by a certified phlebotomist and DNA extracted following standard laboratory procedures.

### Hair phenotyping

Scalp hair features were recorded by physical examination of the volunteers. Natural hair colour was scored in four categories (1-red/reddish, 2-blond, 3-dark blond/light brown or 4-brown/black). Greying was scored on a five-point scale: 1-for no greying, 2-for predominant non-greying, 3-for ∼50% greying, 4-for predominant greying and 5-for totally white hair. Hair curliness was scored as 1-straight, 2-wavy, 3-curly or 4-frizzy. Balding was scored on a three-point scale (none, medium, high) in both women and men. Although frequency of balding in women is low, their inclusion more than doubles sample size, thus adding considerable power to the analyses (Supplementary Fig. 10). Facial hair traits were scored using photographs of the faces of the individuals. Beard density was scored in men using a three-point scale (low, medium or high), separately for shaven and unshaven individuals and scores for these two groups subsequently merged. As an interview of the volunteers indicated that most women modified their eyebrows, monobrow and eyebrow thickness were also only scored in men. Both these traits were scored on three-point scales: eyebrow thickness as low, medium or high, and monobrow as none, medium or high.

The frequency distribution of the traits in the CANDELA sample analysed here is shown in Supplementary Fig. 1.

### DNA genotyping and quality control

DNA samples from participants were genotyped on the Illumina HumanOmniExpress chip including 730,525 SNPs. PLINK v1.9 (ref. 57) was used to exclude SNPs and individuals with more than 5% missing data, markers with minor allele frequency <1%, related individuals and those who failed the X-chromosome sex concordance check (sex estimated from X-chromosome heterozygosity not matching recorded sex information). After applying these filters, 669,462 SNPs and 6,357 individuals (2,922 males and 3,435 females) were retained for further analysis. Because of the admixed nature of the study sample (Supplementary Fig. 2), there is an inflation in Hardy–Weinberg *P* values. We therefore did not exclude markers based on Hardy–Weinberg deviation.

### Statistical genetic analyses

*P* values for Pearson correlation coefficients were obtained by permutation. Narrow-sense heritability (computed as the additive phenotypic variance explained by a kinship matrix computed from the chip genotypes) was estimated using GCTA20 by fitting an additive linear model with a random effect term whose variance is given by the kinship matrix, with age and sex as covariates. The kinship matrix was obtained using the LDAK approach19, which accounts for LD between SNPs. African, European and Native American ancestry was estimated from a set of 93,328 autosomal SNPs (LD-pruned from the full chip data) via supervised runs of ADMIXTURE58. Reference putative parental population data included in the ADMIXTURE analyses for Africans and Europeans were chosen from HAPMAP and for Native Americans from selected Amerindian populations as described in Ruiz-Linares *et al*.17

The chip genotype data were phased using SHAPEIT2 (ref. 59). IMPUTE2 (ref. 60) was then used to impute genotypes at untyped SNPs using variant positions from the 1000 Genomes Phase I data61. The 1000 Genomes reference data set included haplotype information for 1,092 individuals for 36,820,992 variant positions. Positions that are monomorphic in 1000 Genomes Latin American samples (CLM, MXL and PUR) were excluded, leading to 11,025,002 SNPs being imputed in our data set. Of these, 22,737 SNPs had imputation quality scores <0.3 and were excluded. The IMPUTE2 genotype probabilities at each locus were converted into best-guess genotypes using PLINK57. SNPs with uncalled genotypes in >5% of samples or minor allele frequency <1% were excluded. The final imputed data set used in the GWAS analyses included genotypes for 9,143,600 SNPs.

PLINK 1.9 (ref. 57) was used to perform genome-wide association tests for each phenotype using multiple linear regression with an additive genetic model incorporating age, sex and five genetic PCs (principal components) as covariates. The genetic PCs were obtained from the LD-pruned data set of 93,328 SNPs using PLINK 1.9. These PCs were selected by inspecting the proportion of variance explained and checking scatter and screen plots (Supplementary Fig. 3A). Individual outliers were removed and PCs recalculated after each removal. Using these PCs, the *Q*–*Q* plots for all association tests showed no sign of inflation, the genomic control factor *λ* being<1.02 in all cases (Supplementary Fig. 3B). We previously showed that using five PCs in GWAS of the CANDELA sample completely removes the inflation, which is observed when PC adjustment is not used, and increasing the number of PCs included in the regression from five to ten does not provide additional gain18. Association analysis on the imputed data set were performed using the best-guess imputed genotypes in PLINK and using the IMPUTE2 genotype probabilities obtained in SNPTEST v2.5 (ref. 62). Association results from both approaches were consistent with each other and with the results from the chip genotype data. For analysis of the X chromosome, an inactivation model was used (male genotypes encoded as 0/2 and female genotypes as 0/1/2). Individuals with red hair were excluded from the final hair colour GWAS, as it was a rare phenotype (0.55%). Similarly, few individuals were scored as having frizzy hair (2.4%) and these individuals were excluded from the hair shape GWAS. Analyses for hair greying were performed with the five-point scores or with a two-point scale of some greying or no greying and produced similar results.

A meta-analysis was carried out for the index SNPs identified in the GWAS (Table 1) by testing for association separately in each country sample and combining the results using the meta-analysis software METAL22 (as implemented in PLINK 1.9). Forest plots were produced with MATLAB combining all regression coefficients and standard errors. Cochran’s *Q* statistic was computed for each trait to test for effect size heterogeneity across country samples. For SNPs with significant heterogeneity, a random effects model was used for meta-analysis63.

A prediction model was constructed for each hair trait examined, including the associated index SNPs (Table 1) as fixed effects and a random effect term obtained via BLUP (Best Linear Unbiased Predictor) using the genome-wide kinship matrix obtained from the chip data19. The BLUP component is thus sensitive to the effect of SNPs below the threshold for genome-wide significance. Prediction results were obtained through tenfold cross-validation64: the set of samples were randomly split into ten chunks of 10% and used as the test data set, whereas the remaining 90% was used as training data set to fit a prediction model. For each run, *R*2 estimates were calculated (conditional on the covariates) to obtain the proportion of phenotypic variance explained by the model. Average prediction scores across the tenfold runs were calculated. Genetic PCs, age and sex (except for facial hair traits which are male-only) were used as covariates.

To evaluate an enrichment of selection signals at gene regions associated with hair traits, we examined the CMS scores of selection calculated for the three main 1000 Genomes Project populations46: ASN (JPT+CHB), CEU and YRI. We obtained empirical significance cutoffs (1%) separately for each population based on CMS scores for 3,071,032, 3,179,944 and 3,312,050 SNPs (in ASN, CEU and YRI, respectively). In each population, we estimated the mean CMS score for SNPs in a ±2 kb region around each gene, based on the UCSC RefSeq annotation (excluding gene regions with less than four SNPs). We obtained the distribution of mean CMS scores for genes including SNPs associated with the hair traits examined here and compared it with the distribution for all other genes in the genome (19,835, 20,093 and 20,386 gene regions in ASN, CEU and YRI, respectively). We used a suggestive significance level cutoff for inclusion in the set of hair-associated genes (that is, SNP association *P* value <10−5; Table 1 and Supplementary Table 6), resulting in 53, 53 and 55 gene regions being included for ASN, CEU and YRI, respectively. If associated SNPs were in intergenic regions, we included the gene most closely located to this SNP. We contrasted the distribution of mean CMS scores at these gene regions with the distribution for all other gene regions in the genome using a one-sided Mann–Whitney *U*-test.

### Assessment of mouse chin hair follicle density

We examined chin hair placode (follicle primordium) density in E14.5 day mouse embryos. We focused on embryonic day 14.5 (E14.5) as at this embryonic stage the hair pattern is laid out, so that the sites of future hair follicle growth are readily quantifiable by detecting focal expression of the marker gene *Sostdc1* (ref. 65). We performed *in-situ* hybridization18 staining embryos for *Sostdc1* to visualize the placodes present on the lower jaw. At this stage, placodes are visible as rings or filled rings of *Sostdc1* expression. Embryos were positioned to view the lower jaw, imaged from a frontal view and placodes were counted within a rectangular area on the lower jaw. Placode density for each embryo was determined using Image-Pro software (Media Cybernetics).

Average hair placode density for the *Edar*+/+ was 53 placodes per mm2 (standard deviation=1.3, sample size=4) compared with *Edar**Tg951/Tg951*, which was reduced to 35 placodes per mm2 (standard deviation=1.5, sample size=4). All values in the wild-type group were higher than in the transgenic group. A non-parametric Mann–Whitney *U*-test was applied to test the difference between the two sets of hair density values. An exact *P* value calculation was used.

### Immunohistochemistry of PRSS53

Unshaven, full-thickness human adult scalp with terminal hair was used snap frozen in liquid nitrogen in cubes of 2 cm3. Cryosections of 6–8 μm were cut using a cryostat onto adhesive glass slides and incubated with anti-PRSS53 antibody (NBP1, #90678 from Novus) and anti-trichohyalin antibody (AE15, # IQ337 from Immuquest) using standard double immunofluorescence protocols. IgG isotype controls were used at the same concentration as the smallest primary antibody dilution. Co-distribution and co-localization of both antigens in the hair follicle were determined by merging of the PRSS53- and trichohyalin-positive channels.

### *In-vitro* analysis of PRSS53

*Mutagenesis*. To introduce the Q30R substitution in the PRSS56 sequence, the QuikChange II XL Site-Directed Mutagenesis Kit (Agilent) was employed following the instructions by the manufacturer. Primers designed for mutagenesis were: poli3MUT-FOR 5′- CAGCGTGCCTGTGGACGGCGTGGCCCCGGC -3′ and poli3MUR-REV 5′- GCCGGGGCCACGCCGTCCACAGGCACGCTG -3′, and we employ as template a previously published plasmid containing the entire PRSS53 sequence, which includes a FLAG epitope66. PCR conditions were as follows: 95 °C, 1 min (1 cycle); 95 °C, 50 s, 66°, 50 s and 68° 12 min (18 cycles); and 68 °C, 7 min (1 cycle). PCR products were visualized in a 1.0% agarose gel and DNA sequence was verified before experimental use.

*Cell culture and transfection*. 293-EBNA cells were routinely maintained at 37 °C in 5% CO2 in DMEM supplemented with 10% fetal bovine serum and 50 μg ml−1 streptomycin and 100 U ml−1 penicillin (Life Technologies). Expression vectors were transfected into cells using TransIT-X2 Dynamic Delivery System (Mirus) as recommended by the manufacturer. Cell conditioned medium was obtained from 293-EBNA cultures for 2 days in medium without added serum. When indicated, the proprotein convertase inhibitor decanoyl-RVKR-CMK was added at 20 μmol L−1.

*Polyacrylamide gel electrophoresis and western blot*. Cell extracts were resolved by 13% polyacrylamide gel electrophoresis, transferred to a nitrocellulose membrane and then incubated overnight with an anti-FLAG antibody (Sigma). Immunoreactive proteins were visualized using horseradish peroxidase (HRP)-peroxidase-labelled anti-rabbit antibody (Pierce), and developed with the Luminata Forte Western HRP substrate (Millipore). An anti-actin antibody (Sigma) was employed to ascertain equal loading. To detect the presence of recombinant proteins in conditioned medium, 4 ml of conditioned medium were concentrated till 100 μl using and Speed-Vac centrifuge (Savant). Then, 12 μl of each sample were loaded per lane for further identification as indicated above. A pCEP control plasmid (empty vector) was used as a negative control for all these assays.

*Cell staining*. For immunocytochemical analysis of 293-EBNA cells expressing PRSS53 or PRSS53 Q30R, cells were fixed with 4% paraformaldehyde in phosphate-buffered saline buffer and cells were then blocked with 15% fetal bovine serum. To detect recombinant PRSS53 and PRSS53 Q30R proteins, blocked slides were incubated overnight with an anti-FLAG antibody (Sigma), followed by 2 h of incubation with a secondary Alexa 488-conjugated antibody (Life Technologies). An anti-calreticulin antibody (Mirus) was employed to examine co-localization of both forms of PRSS53 with endoplasmic reticulum. To detect calreticulin, a secondary Alexa 546-conjugated antibody was employed. For negative controls, same protocol was employed with the exception that primary antibodies were absent. Images were obtained using a fluorescence microscope and a digital camera (Axiovert).

## Additional information

**How to cite this article:** Adhikari, K. *et al*. A genome-wide association scan in admixed Latin Americans identifies loci influencing facial and scalp hair features. *Nat. Commun.* 7:10815 doi: 10.1038/ncomms10815 (2016).

## References

1. Bradley, B. J. M., N.I. The primate palette: the evolution of primate coloration. *Evol. Anthropol.* **17**, 97–111 (2008).

   Article 
   Google Scholar
2. Jablonski, N. G. *Skin: A Natural History* Univ. of California Press (2006).
3. Jablonski, N. G. The naked truth. *Sci. Am.* **302**, 42–49 (2010).

   Article 
   PubMed 
   Google Scholar
4. Loussouarn, G. et al. Worldwide diversity of hair curliness: a new method of assessment. *Int. J. Dermatol.* **46**, (Suppl 1): 2–6 (2007).

   Article 
   PubMed 
   Google Scholar
5. Panhard, S., Lozano, I. & Loussouarn, G. Greying of the human hair: a worldwide survey, revisiting the '50' rule of thumb. *Br. J. Dermatol.* **167**, 865–873 (2012).

   Article 
   CAS 
   PubMed 
   Google Scholar
6. Westgate, G. E., Botchkareva, N. V. & Tobin, D. J. The biology of hair diversity. *Int. J. Cosmet. Sci.* **35**, 329–336 (2013).

   Article 
   CAS 
   PubMed 
   Google Scholar
7. Nyholt, D. R., Gillespie, N. A., Heath, A. C. & Martin, N. G. Genetic basis of male pattern baldness. *J. Invest. Dermatol.* **121**, 1561–1564 (2003).

   Article 
   PubMed 
   Google Scholar
8. Gunn, D. A. et al. Why some women look young for their age. *PLoS ONE* **4**, e8021 (2009).

   Article 
   ADS 
   PubMed 
   PubMed Central 
   Google Scholar
9. Medland, S. E., Zhu, G. & Martin, N. G. Estimating the heritability of hair curliness in twins of European ancestry. *Twin. Res. Hum. Genet.* **12**, 514–518 (2009).

   Article 
   PubMed 
   Google Scholar
10. Lin, B. D. et al. Heritability and Genome-Wide Association Studies for Hair Color in a Dutch Twin Family Based Sample. *Genes (Basel)* **6**, 559–576 (2015).

    Article 
    CAS 
    Google Scholar
11. Frost, P. The Puzzle of European Hair, Eye, and Skin Color. *Adv. Anthropol.* **4**, 78–88 (2014).

    Article 
    Google Scholar
12. Li, R. et al. Six novel susceptibility Loci for early-onset androgenetic alopecia and their unexpected association with common diseases. *PLoS Genet.* **8**, e1002746 (2012).

    Article 
    CAS 
    PubMed 
    PubMed Central 
    Google Scholar
13. Liu, F., Wen, B. & Kayser, M. Colorful DNA polymorphisms in humans. *Semin. Cell Dev. Biol.* **24**, 562–575 (2013).

    Article 
    CAS 
    PubMed 
    Google Scholar
14. Medland, S. E. et al. Common variants in the trichohyalin gene are associated with straight hair in Europeans. *Am. J. Hum. Genet.* **85**, 750–755 (2009).

    Article 
    CAS 
    PubMed 
    PubMed Central 
    Google Scholar
15. Eriksson, N. et al. Web-based, participant-driven studies yield novel genetic associations for common traits. *PLoS Genet.* **6**, e1000993 (2010).

    Article 
    PubMed 
    PubMed Central 
    Google Scholar
16. Tan, J. et al. The adaptive variant EDARV370A is associated with straight hair in East Asians. *Hum. Genet.* **132**, 1187–1191 (2013).

    Article 
    CAS 
    PubMed 
    Google Scholar
17. Ruiz-Linares, A. et al. Admixture in latin america: geographic structure, phenotypic diversity and self-perception of ancestry based on 7,342 individuals. *PLoS Genet.* **10**, e1004572 (2014).

    Article 
    PubMed 
    PubMed Central 
    Google Scholar
18. Adhikari, K. et al. A genome-wide association study identifies multiple loci for variation in human ear morphology. *Nat. Commun.* **6**, 7500 (2015).

    Article 
    CAS 
    PubMed 
    Google Scholar
19. Speed, D., Hemani, G., Johnson, M. R. & Balding, D. J. Improved heritability estimation from genome-wide SNPs. *Am. J. Hum. Genet.* **91**, 1011–1021 (2012).

    Article 
    CAS 
    PubMed 
    PubMed Central 
    Google Scholar
20. Yang, J., Lee, S. H., Goddard, M. E. & Visscher, P. M. GCTA: a tool for genome-wide complex trait analysis. *Am. J. Hum. Genet.* **88**, 76–82 (2011).

    Article 
    CAS 
    PubMed 
    PubMed Central 
    Google Scholar
21. Purcell, S. et al. PLINK: a tool set for whole-genome association and population-based linkage analyses. *Am. J. Hum. Genet.* **81**, 559–575 (2007).

    Article 
    CAS 
    PubMed 
    PubMed Central 
    Google Scholar
22. Willer, C. J., Li, Y. & Abecasis, G. R. METAL: fast and efficient meta-analysis of genomewide association scans. *Bioinformatics* **26**, 2190–2191 (2010).

    Article 
    CAS 
    PubMed 
    PubMed Central 
    Google Scholar
23. Mikkola, M. L. Molecular aspects of hypohidrotic ectodermal dysplasia. *Am. J. Med. Genet. A* **149A**, 2031–2036 (2009).

    Article 
    CAS 
    PubMed 
    Google Scholar
24. Fujimoto, A. et al. A scan for genetic determinants of human hair morphology: EDAR is associated with Asian hair thickness. *Hum. Mol. Genet.* **17**, 835–843 (2008).

    Article 
    CAS 
    PubMed 
    Google Scholar
25. Fujimoto, A. et al. A replication study confirmed the EDAR gene to be a major contributor to population differentiation regarding head hair thickness in Asia. *Hum. Genet.* **124**, 179–185 (2008).

    Article 
    PubMed 
    Google Scholar
26. Mou, C. et al. Enhanced ectodysplasin-A receptor (EDAR) signaling alters multiple fiber characteristics to produce the East Asian hair form. *Hum. Mutat.* **29**, 1405–1411 (2008).

    Article 
    CAS 
    PubMed 
    Google Scholar
27. Kamberov, Y. G. et al. Modeling recent human evolution in mice by expression of a selected EDAR variant. *Cell* **152**, 691–702 (2013).

    Article 
    CAS 
    PubMed 
    PubMed Central 
    Google Scholar
28. Bhogal, R. K., Mouser, P. E., Higgins, C. A. & Turner, G. A. Protease activity, localization and inhibition in the human hair follicle. *Int. J. Cosmet. Sci.* **36**, 46–53 (2014).

    Article 
    CAS 
    PubMed 
    Google Scholar
29. Spacek, D. V. et al. The mouse frizzy (fr) and rat 'hairless' (frCR) mutations are natural variants of protease serine S1 family member 8 (Prss8). *Exp. Dermatol.* **19**, 527–532 (2010).

    Article 
    CAS 
    PubMed 
    Google Scholar
30. Leyvraz, C. et al. The epidermal barrier function is dependent on the serine protease CAP1/Prss8. *J. Cell Biol.* **170**, 487–496 (2005).

    Article 
    CAS 
    PubMed 
    PubMed Central 
    Google Scholar
31. Mlitz, V. et al. Trichohyalin-like proteins have evolutionarily conserved roles in the morphogenesis of skin appendages. *J. Invest. Dermatol.* **134**, 2685–2692 (2014).

    Article 
    CAS 
    PubMed 
    PubMed Central 
    Google Scholar
32. Kaufman, C. K. et al. GATA-3: an unexpected regulator of cell lineage determination in skin. *Genes Dev.* **17**, 2108–2122 (2003).

    Article 
    CAS 
    PubMed 
    PubMed Central 
    Google Scholar
33. Kurek, D., Garinis, G. A., van Doorninck, J. H., van der Wees, J. & Grosveld, F. G. Transcriptome and phenotypic analysis reveals Gata3-dependent signalling pathways in murine hair follicles. *Development* **134**, 261–272 (2007).

    Article 
    CAS 
    PubMed 
    Google Scholar
34. D'Haene, B. et al. Disease-causing 7.4kb cis-regulatory deletion disrupting conserved non-coding sequences and their interaction with the FOXL2 promotor: implications for mutation screening. *PLoS Genet.* **5**, e1000522 (2009).

    Article 
    PubMed 
    PubMed Central 
    Google Scholar
35. Heude, E. et al. Etiology of craniofacial malformations in mouse models of blepharophimosis, ptosis, and epicanthus inversus syndrome. *Hum. Mol. Genet.* **24**, 1670–1681 (2015).

    Article 
    CAS 
    PubMed 
    Google Scholar
36. Shi, F. et al. A piggyBac insertion disrupts Foxl2 expression that mimics BPES syndrome in mice. *Hum. Mol. Genet.* **23**, 3792–3800 (2014).

    Article 
    CAS 
    PubMed 
    Google Scholar
37. Pingault, V. et al. Review and update of mutations causing Waardenburg syndrome. *Hum. Mutat.* **31**, 391–406 (2010).

    Article 
    CAS 
    PubMed 
    Google Scholar
38. Liu, F. et al. A genome-wide association study identifies five loci influencing facial morphology in Europeans. *PLoS Genet.* **8**, e1002932 (2012).

    Article 
    CAS 
    PubMed 
    PubMed Central 
    Google Scholar
39. Paternoster, L. et al. Genome-wide association study of three-dimensional facial morphology identifies a variant in PAX3 associated with nasion position. *Am. J. Hum. Genet.* **90**, 478–485 (2012).

    Article 
    CAS 
    PubMed 
    PubMed Central 
    Google Scholar
40. Monsoro-Burq, A. H. PAX transcription factors in neural crest development. *Semin. Cell Dev. Biol.* **44**, 87–96 (2015).

    Article 
    CAS 
    PubMed 
    Google Scholar
41. Praetorius, C. et al. A polymorphism in IRF4 affects human pigmentation through a tyrosinase-dependent MITF/TFAP2A pathway. *Cell* **155**, 1022–1033 (2013).

    Article 
    CAS 
    PubMed 
    Google Scholar
42. Steinert, P. M., Parry, D. A. & Marekov, L. N. Trichohyalin mechanically strengthens the hair follicle: multiple cross-bridging roles in the inner root shealth. *J. Biol. Chem.* **278**, 41409–41419 (2003).

    Article 
    CAS 
    PubMed 
    Google Scholar
43. Fischer, H. et al. Essential role of the keratinocyte-specific endonuclease DNase1L2 in the removal of nuclear DNA from hair and nails. *J. Invest. Dermatol.* **131**, 1208–1215 (2011).

    Article 
    CAS 
    PubMed 
    PubMed Central 
    Google Scholar
44. Wagner, R. & Joekes, I. Hair medulla morphology and mechanical properties. *J. Cosmet. Sci.* **58**, 359–368 (2007).

    PubMed 
    Google Scholar
45. Tsuji, A. et al. Engineering of alpha I-antitrypsin variants selective for subtilisin-like proprotein convertases PACE4 and PC6: importance of the P2' residue in stable complex formation of the serpin with proprotein convertase. *Protein Engin. Des. Sel.* **20**, 163–170 (2007).

    Article 
    CAS 
    Google Scholar
46. Grossman, S. R. et al. Identifying recent adaptations in large-scale genomic data. *Cell* **152**, 703–713 (2013).

    Article 
    CAS 
    PubMed 
    PubMed Central 
    Google Scholar
47. Grossman, S. R. et al. A composite of multiple signals distinguishes causal variants in regions of positive selection. *Science* **327**, 883–886 (2010).

    Article 
    ADS 
    CAS 
    PubMed 
    Google Scholar
48. Medland, S. E. et al. Common variants in the trichohyalin gene are associated with straight hair in Europeans. *Am. J. Hum. Genet.* **85**, 750–755 (2009).

    Article 
    CAS 
    PubMed 
    PubMed Central 
    Google Scholar
49. Tobin, D. J. et al. The lysosomal protease cathepsin L is an important regulator of keratinocyte and melanocyte differentiation during hair follicle morphogenesis and cycling. *Am. J. Pathol.* **160**, 1807–1821 (2002).

    Article 
    CAS 
    PubMed 
    PubMed Central 
    Google Scholar
50. Eissa, A. & Diamandis, E. P. Human tissue kallikreins as promiscuous modulators of homeostatic skin barrier functions. *Biol. Chem.* **389**, 669–680 (2008).

    Article 
    CAS 
    PubMed 
    Google Scholar
51. Le, N. A. et al. Regulation of serine protease inhibitor Kazal type-5 (SPINK5) gene expression in the keratinocytes. *Environ Health Prev. Med.* **19**, 307–313 (2014).

    Article 
    CAS 
    PubMed 
    PubMed Central 
    Google Scholar
52. Johansson, J. A. & Headon, D. J. Regionalisation of the skin. *Semin. Cell Dev. Biol.* **25-26**, 3–10 (2014).

    Article 
    PubMed 
    Google Scholar
53. Mou, C., Jackson, B., Schneider, P., Overbeek, P. A. & Headon, D. J. Generation of the primary hair follicle pattern. *Proc. Natl Acad. Sci. USA* **103**, 9075–9080 (2006).

    Article 
    ADS 
    CAS 
    PubMed 
    PubMed Central 
    Google Scholar
54. Held, L. I. The evo-devo puzzle of human hair patterning. *Evol. Biol.* **37**, 113–122 (2010).

    Article 
    Google Scholar
55. Matama, T., Gomes, A. C. & Cavaco-Paulo, A. Hair coloration by gene regulation: fact or fiction? *Trends Biotechnol.* **33**, 707–711 (2015).

    Article 
    CAS 
    PubMed 
    Google Scholar
56. Pospiech, E. et al. Evaluation of the predictive capacity of DNA variants associated with straight hair in Europeans. *Forensic Sci. Int. Genet.* **19**, 280–288 (2015).

    Article 
    CAS 
    PubMed 
    Google Scholar
57. Chang, C. C. et al. Second-generation PLINK: rising to the challenge of larger and richer datasets. *Gigascience* **4**, 7 (2015).

    Article 
    PubMed 
    PubMed Central 
    Google Scholar
58. Alexander, D. H., Novembre, J. & Lange, K. Fast model-based estimation of ancestry in unrelated individuals. *Genome Res.* **19**, 1655–1664 (2009).

    Article 
    CAS 
    PubMed 
    PubMed Central 
    Google Scholar
59. O'Connell, J. et al. A general approach for haplotype phasing across the full spectrum of relatedness. *PLoS Genet.* **10**, e1004234 (2014).

    Article 
    PubMed 
    PubMed Central 
    Google Scholar
60. Howie, B., Fuchsberger, C., Stephens, M., Marchini, J. & Abecasis, G. R. Fast and accurate genotype imputation in genome-wide association studies through pre-phasing. *Nature Genet.* **44**, 955–959 (2012).

    Article 
    CAS 
    PubMed 
    Google Scholar
61. Genomes Project Consortium. et al. An integrated map of genetic variation from 1,092 human genomes. *Nature* **491**, 56–65 (2012).
62. Marchini, J. & Howie, B. Genotype imputation for genome-wide association studies. *Nat. Rev. Genet.* **11**, 499–511 (2010).

    Article 
    CAS 
    PubMed 
    Google Scholar
63. Higgins, J. P. & Thompson, S. G. Quantifying heterogeneity in a meta-analysis. *Stat. Med.* **21**, 1539–1558 (2002).

    Article 
    PubMed 
    Google Scholar
64. Hastie, T., Tibshirani, R. & Friedman, J. H. *The Elements of Statistical Learning: Data Mining, Inference, and Prediction,* xxii 745 (Springer (2009).
65. Narhi, K. et al. Sostdc1 defines the size and number of skin appendage placodes. *Dev. Biol.* **364**, 149–161 (2012).

    Article 
    CAS 
    PubMed 
    Google Scholar
66. Cal, S. et al. Identification and characterization of human polyserase-3, a novel protein with tandem serine-protease domains in the same polypeptide chain. *BMC Biochem* **7**, 9 (2006).

    Article 
    PubMed 
    PubMed Central 
    Google Scholar
67. Incorporated, A. S. *Adobe Photoshop CS6* San Jose (2012).
68. Pruim, R. J. et al. LocusZoom: regional visualization of genome-wide association scan results. *Bioinformatics* **26**, 2336–2337 (2010).

    Article 
    CAS 
    PubMed 
    PubMed Central 
    Google Scholar
69. Barrett, J. C., Fry, B., Maller, J. & Daly, M. J. Haploview: analysis and visualization of LD and haplotype maps. *Bioinformatics* **21**, 263–265 (2005).

    Article 
    CAS 
    PubMed 
    Google Scholar

Download references

## Acknowledgements

We are grateful to the volunteers for their enthusiastic support for this research. We thank Alvaro Alvarado, Mónica Ballesteros Romero, Ricardo Cebrecos, Miguel Ángel Contreras Sieck, Francisco de Ávila Becerril, Joyce De la Piedra, María Teresa Del Solar, Paola Everardo Martínez, William Flores, Martha Granados Riveros, Ilich Jafet Moreno, Jodie Lampert, Paola León-Mimila, Francisco Quispealaya, Diana Rogel Diaz, Ruth Rojas, Norman Russell, Vanessa Sarabia, Rosilene Paim, Ricardo Gunski, Sergeant João Felisberto Menezes Cavalheiro and Major Eugênio Correa de Souza Junior for assistance with volunteer recruitment, sample processing and data entry. We also thank Richard Baker for technical assistance with the human skin immunofluorescence, Pardis Sabeti and Matteo Fumagalli for advice on the analysis of CMS scores, Elfride De Baere for information on clinical features of BPES patients, Doug Speed for advice on the prediction analysis, Barbara Kremeyer for comments on the manuscript and Emiliano Bellini for the face illustrations in Fig. 1. The following institutions kindly provided facilities for the assessment of volunteers: Escuela Nacional de Antropología e Historia and Universidad Nacional Autónoma de México (México); Pontificia Universidad Católica del Perú, Universidad de Lima and Universidad Nacional Mayor de San Marcos (Perú); Universidade Federal do Rio Grande do Sul (Brazil); 13° Companhia de Comunicações Mecanizada do Exército Brasileiro (Brazil). This work was funded by grants from: the Leverhulme Trust (F/07 134/DF to ARL), BBSRC (BB/I021213/1 to ARL and Institute Strategic Programme grant to The Roslin Institute); Universidad de Antioquia, Colombia (CODI sostenibilidad de grupos 2013- 2014 and MASO 2013-2014); Ministerio de Economía y Competitividad and Instituto de Salud Carlos III (RTICC), Spain. C.L.-O. is an Investigator of the Botin Foundation supported by the Banco Santander through its Santander Universities Global Division.

## Author information

Author notes

1. Tábita Hunemeier

   Present address: Present address: Departamento de Genética e Biologia Evolutiva, Universidade de São Paulo, 05508-090, SP, Brasil,

### Authors and Affiliations

1. Department of Genetics, Evolution and Environment, and UCL Genetics Institute, University College London, London, WC1E 6BT, UK

   Kaustubh Adhikari, Javier Mendoza-Revilla, Macarena Fuentes-Guajardo, Juan-Camilo Chacón-Duque, Farah Al-Saadi, Victor Acuña-Alonzo, David Balding & Andrés Ruiz-Linares
2. Departamento de Bioquímica y Biología Molecular, IUOPA, Universidad de Oviedo, Oviedo, 33006,, Spain

   Tania Fontanil, Santiago Cal & Carlos López-Otín
3. Laboratorios de Investigación y Desarrollo, Facultad de Ciencias y Filosofía, Universidad Peruana Cayetano Heredia, Lima, 31, Perú,

   Javier Mendoza-Revilla, Malena Hurtado, Valeria Villegas, Vanessa Granja, Carla Gallo & Giovanni Poletti
4. Departamento de Tecnología Médica, Facultad de Ciencias de la Salud, Universidad de Tarapacá, Arica, 1000009, Chile

   Macarena Fuentes-Guajardo
5. Roslin Institute and Royal (Dick) School of Veterinary Studies, University of Edinburgh, Midlothian, EH25 9RG, UK

   Jeanette A. Johansson & Denis Headon
6. Centro Nacional Patagónico, CONICET, Puerto Madryn, U9129ACD, Argentina

   Mirsha Quinto-Sanchez, Virginia Ramallo, Caio C. Silva de Cerqueira & Rolando Gonzalez-José
7. National Institute of Anthropology and History, México, 4510, México

   Victor Acuña-Alonzo, Rodrigo Barquera Lozano & Gastón Macín Pérez
8. GENMOL (Genética Molecular), Universidad de Antioquia, Medellín 5001000, Colombia,

   Claudia Jaramillo, William Arias & Gabriel Bedoya
9. Unidad de Genómica de Poblaciones Aplicada a la Salud, Facultad de Química, UNAM-Instituto Nacional de Medicina Genómica, México, 4510, México

   Rodrigo Barquera Lozano, Gastón Macín Pérez, Hugo Villamil-Ramírez & Samuel Canizales-Quinteros
10. Facultad de Medicina, UNAM, México, 4510, México

    Jorge Gómez-Valdés
11. Departamento de Genética, Universidade Federal do Rio Grande do Sul, Porto Alegre, 91501-970, Brasil

    Tábita Hunemeier, Virginia Ramallo, Caio C. Silva de Cerqueira, Lavinia Schuler-Faccini, Francisco M. Salzano & Maria-Cátira Bortolini
12. Instituto de Alta Investigación, Universidad de Tarapacá, Arica, 1000000, Chile

    Francisco Rothhammer
13. Centre for Skin Sciences, Faculty of Life Sciences, University of Bradford, Bradford, BD7 1DP, Victoria, UK

    Desmond J. Tobin
14. Schools of BioSciences and Mathematics and Statistics, University of Melbourne, Melbourne, 3010, Australia

    David Balding

Authors

1. Kaustubh Adhikari

   View author publications

   You can also search for this author in
   PubMed Google Scholar
2. Tania Fontanil

   View author publications

   You can also search for this author in
   PubMed Google Scholar
3. Santiago Cal

   View author publications

   You can also search for this author in
   PubMed Google Scholar
4. Javier Mendoza-Revilla

   View author publications

   You can also search for this author in
   PubMed Google Scholar
5. Macarena Fuentes-Guajardo

   View author publications

   You can also search for this author in
   PubMed Google Scholar
6. Juan-Camilo Chacón-Duque

   View author publications

   You can also search for this author in
   PubMed Google Scholar
7. Farah Al-Saadi

   View author publications

   You can also search for this author in
   PubMed Google Scholar
8. Jeanette A. Johansson

   View author publications

   You can also search for this author in
   PubMed Google Scholar
9. Mirsha Quinto-Sanchez

   View author publications

   You can also search for this author in
   PubMed Google Scholar
10. Victor Acuña-Alonzo

    View author publications

    You can also search for this author in
    PubMed Google Scholar
11. Claudia Jaramillo

    View author publications

    You can also search for this author in
    PubMed Google Scholar
12. William Arias

    View author publications

    You can also search for this author in
    PubMed Google Scholar
13. Rodrigo Barquera Lozano

    View author publications

    You can also search for this author in
    PubMed Google Scholar
14. Gastón Macín Pérez

    View author publications

    You can also search for this author in
    PubMed Google Scholar
15. Jorge Gómez-Valdés

    View author publications

    You can also search for this author in
    PubMed Google Scholar
16. Hugo Villamil-Ramírez

    View author publications

    You can also search for this author in
    PubMed Google Scholar
17. Tábita Hunemeier

    View author publications

    You can also search for this author in
    PubMed Google Scholar
18. Virginia Ramallo

    View author publications

    You can also search for this author in
    PubMed Google Scholar
19. Caio C. Silva de Cerqueira

    View author publications

    You can also search for this author in
    PubMed Google Scholar
20. Malena Hurtado

    View author publications

    You can also search for this author in
    PubMed Google Scholar
21. Valeria Villegas

    View author publications

    You can also search for this author in
    PubMed Google Scholar
22. Vanessa Granja

    View author publications

    You can also search for this author in
    PubMed Google Scholar
23. Carla Gallo

    View author publications

    You can also search for this author in
    PubMed Google Scholar
24. Giovanni Poletti

    View author publications

    You can also search for this author in
    PubMed Google Scholar
25. Lavinia Schuler-Faccini

    View author publications

    You can also search for this author in
    PubMed Google Scholar
26. Francisco M. Salzano

    View author publications

    You can also search for this author in
    PubMed Google Scholar
27. Maria-Cátira Bortolini

    View author publications

    You can also search for this author in
    PubMed Google Scholar
28. Samuel Canizales-Quinteros

    View author publications

    You can also search for this author in
    PubMed Google Scholar
29. Francisco Rothhammer

    View author publications

    You can also search for this author in
    PubMed Google Scholar
30. Gabriel Bedoya

    View author publications

    You can also search for this author in
    PubMed Google Scholar
31. Rolando Gonzalez-José

    View author publications

    You can also search for this author in
    PubMed Google Scholar
32. Denis Headon

    View author publications

    You can also search for this author in
    PubMed Google Scholar
33. Carlos López-Otín

    View author publications

    You can also search for this author in
    PubMed Google Scholar
34. Desmond J. Tobin

    View author publications

    You can also search for this author in
    PubMed Google Scholar
35. David Balding

    View author publications

    You can also search for this author in
    PubMed Google Scholar
36. Andrés Ruiz-Linares

    View author publications

    You can also search for this author in
    PubMed Google Scholar

### Contributions

K.A., M.Q.-S., R.G.-J., D.H., D.B., A.R.-L. conceived and designed the study. K.A., J.M.-R., M.F.-G., V.A.-A., C.J., W.A., R.B.L., G.M.P., J.G.-V., H.V.-R., T.H., V.R., C.C.S. de C., M.H., V.V., V.G., D.H. and D.J.T. contributed reagents/material. T.F., S.C., J.M.-R., J.C.C.-D., F.A.-S., J.A.J., M.Q.-S., D.H., C.L.-O. performed the experiments. K.A., T.F., S.C., J.M.-R., J.A.J., M.Q.-S., D.H., C.L.-O., D.J.T. and A.R.-L. analysed data. V.A.-A., J.G.-V., C.G., G.P., L.S.-F., F.M.S., M.-C.B., S.C.-Q., F.R., G.B., R.G.-J., D.H., D.J.T., D.B. and A.R.-L. supervised the research (PI). K.A. and A.R.-L. wrote the manuscript, incorporating input from other authors. Critical revision of the manuscript was done by C.G., G.P., S.C.-Q., R.G.-J., D.H., D.J.T. and D.B.

### Corresponding author

Correspondence to
Andrés Ruiz-Linares.

## Ethics declarations

### Competing interests

The authors declare no competing financial interests.

## Supplementary information

### Supplementary Information

Supplementary Figures 1-11, Supplementary Tables 1-7 and Supplementary References (PDF 4445 kb)

## Rights and permissions

This work is licensed under a Creative Commons Attribution 4.0 International License. The images or other third party material in this article are included in the article’s Creative Commons license, unless indicated otherwise in the credit line; if the material is not included under the Creative Commons license, users will need to obtain permission from the license holder to reproduce the material. To view a copy of this license, visit http://creativecommons.org/licenses/by/4.0/

Reprints and permissions

## About this article

### Cite this article

Adhikari, K., Fontanil, T., Cal, S. *et al.* A genome-wide association scan in admixed Latin Americans identifies loci influencing facial and scalp hair features.
*Nat Commun* **7**, 10815 (2016). https://doi.org/10.1038/ncomms10815

Download citation

- Received: 13 July 2015
- Accepted: 25 January 2016
- Published: 01 March 2016
- DOI: https://doi.org/10.1038/ncomms10815

### Share this article

Anyone you share the following link with will be able to read this content:

Get shareable link

Sorry, a shareable link is not currently available for this article.

Copy to clipboard

Provided by the Springer Nature SharedIt content-sharing initiative

## This article is cited by

- ### Irradiation-induced hair graying in mice: an experimental model to evaluate the effectiveness of interventions targeting oxidative stress, DNA damage prevention, and cellular senescence

  - Anna Ungvari
  - Tamas Kiss
  - Zoltan Ungvari

  *GeroScience* (2024)
- ### Analysis of 72,469 UK Biobank exomes links rare variants to male-pattern hair loss

  - Sabrina Katrin Henne
  - Rana Aldisi
  - Stefanie Heilmann-Heimbach

  *Nature Communications* (2023)
- ### Neanderthal introgression in SCN9A impacts mechanical pain sensitivity

  - Pierre Faux
  - Li Ding
  - Andrés Ruiz-Linares

  *Communications Biology* (2023)
- ### Evaluation of facial hair-associated SNPs: a pilot study on male Pakistani Punjabi population

  - Muhammad Jawad
  - Atif Adnan
  - Allah Rakha

  *Forensic Science, Medicine and Pathology* (2022)
- ### Polygenic control of the wavy coat of the NCT mouse: involvement of an intracisternal A particle insertional mutation of the protease, serine 53 (Prss53) gene, and a modifier gene

  - Masayuki Mori
  - Chang Liu
  - Keiichi Higuchi

  *Mammalian Genome* (2022)

## Comments

By submitting a comment you agree to abide by our Terms and Community Guidelines. If you find something abusive or that does not comply with our terms or guidelines please flag it as inappropriate.


Download PDF

Advertisement

## Explore content

- Research articles
- Reviews & Analysis
- News & Comment
- Videos
- Collections
- Subjects

- Follow us on Facebook
- Follow us on Twitter
- Sign up for alerts
- RSS feed


## About the journal

- Aims & Scope
- Editors
- Journal Information
- Open Access Fees and Funding
- Calls for Papers
- Editorial Values Statement
- Journal Metrics
- Editors' Highlights
- Contact
- Editorial policies
- Top Articles


## Publish with us

- For authors
- For Reviewers
- Language editing services
- Submit manuscript

## Search

Search articles by subject, keyword or author

Show results from

All journals
This journal

Search

Advanced search

### Quick links

- Explore articles by subject
- Find a job
- Guide to authors
- Editorial policies

Nature Communications (*Nat Commun*)

ISSN 2041-1723 (online)

## nature.com sitemap

### About Nature Portfolio

- About us
- Press releases
- Press office
- Contact us

### Discover content

- Journals A-Z
- Articles by subject
- protocols.io
- Nature Index

### Publishing policies

- Nature portfolio policies
- Open access

### Author & Researcher services

- Reprints & permissions
- Research data
- Language editing
- Scientific editing
- Nature Masterclasses
- Research Solutions

### Libraries & institutions

- Librarian service & tools
- Librarian portal
- Open research
- Recommend to library

### Advertising & partnerships

- Advertising
- Partnerships & Services
- Media kits
- Branded
  content

### Professional development

- Nature Careers
- Nature 
  Conferences

### Regional websites

- Nature Africa
- Nature China
- Nature India
- Nature Italy
- Nature Japan
- Nature Middle East

- Privacy
  Policy
- Use
  of cookies
- Your privacy choices/Manage cookies
- Legal
  notice
- Accessibility
  statement
- Terms & Conditions
- Your US state privacy rights

© 2024 Springer Nature Limited

xml version="1.0" encoding="UTF-8"?

Close banner

Close

Sign up for the *Nature Briefing* newsletter — what matters in science, free to your inbox daily.

Email address

Sign up

I agree my information will be processed in accordance with the *Nature* and Springer Nature Limited Privacy Policy.

Close banner

Close

Get the most important science stories of the day, free in your inbox.
Sign up for Nature Briefing
